# Supplementary material
Source: PubMed Central journal article supplement (PMC6375460)

**Note to readers with disabilities:** *EHP* strives to ensure that all journal content is accessible to all readers. However, some figures and Supplemental Material published in *EHP* articles may not conform to [508 standards](#) due to the complexity of the information being presented. If you need assistance accessing journal content, please contact [ehp508@niehs.nih.gov](mailto:ehp508@niehs.nih.gov). Our staff will work with you to assess and meet your accessibility needs within 3 working days.

### **Supplemental Material**

#### **Residential Proximity to Major Roadways at Birth, DNA Methylation at Birth and Midchildhood, and Childhood Cognitive Test Scores: Project Viva (Massachusetts, USA)**

Cheng Peng, Martijn den Dekker, Andres Cardenas, Sheryl L. Rifas-Shiman, Heike Gibson, Golareh Agha, Maria H. Harris, Brent A. Coull, Joel Schwartz, Augusto A. Litonjua, Dawn L. DeMeo, Marie-France Hivert, Matthew W. Gilman, Sharon K. Sagiv, Yvonne de Kluizenaar, Janine F. Felix, Vincent W. Jaddoe, Emily Oken, Liesbeth Duijts, Diane R. Gold, and Andrea A. Baccarelli

#### **Table of Contents**

**Table S1.** Summary statistics of FDR-significant CpG sites (for the association between residential proximity to roadways at birth and cord blood DNA methylation) in cord blood (N=482) and in peripheral blood (N=457) in Project Viva. Summary statistics are present on the beta-value scale (0%-100% methylation).

**Table S2.** Differential methylation (%) (95% CI) in cord blood DNA associated with a 50% reduction in prenatal residential proximity to major roadways, stratified by sex and race/ethnicity.

**Figure S1.** Q-Q plot of the association between residential proximity to roadway at birth and cord blood epigenome-wide DNA methylation (x-axis is the expected  $-\log_{10}(\text{p-value})$ , y-axis is the observed  $-\log_{10}(\text{p-value})$ ,  $\lambda = 0.97$ ).

**Figure S2.** Scatter plot of residential proximity to major roadways at birth and DNA methylation in cord blood for the 4 CpG sites that met  $\text{FDR} < 0.05$  epigenome-wide threshold.

**Figure S3.** Scatter plot of DNA methylation in cord blood of newborns and peripheral blood at mid-childhood for the 4 CpG sites that met  $\text{FDR} < 0.05$  epigenome-wide threshold.

**Figure S4.** Correlation between residential proximity to major roadways at birth and cell proportions (a) in cord blood and (b) in peripheral blood at mid-childhood.

**Figure S5.** A comparison between blood and post-mortal brain tissues (prefrontal cortex, entorhinal cortex, superior temporal gyrus and cerebellum) for the FDR significant CpGs we identified.

**Additional File - Excel Document**

**Table S1.** Summary statistics of FDR-significant CpG sites (for the association between residential proximity to roadways at birth and cord blood DNA methylation) in cord blood (N=482) and in peripheral blood (N=457) in Project Viva. Summary statistics are present on the beta-value scale (0%-100% methylation).

|                         |             |           | <b>Percentile</b>      |                        |                        |
|-------------------------|-------------|-----------|------------------------|------------------------|------------------------|
| <b>Cord blood</b>       | <b>Mean</b> | <b>SD</b> | <b>10<sup>th</sup></b> | <b>50<sup>th</sup></b> | <b>90<sup>th</sup></b> |
| cg05654765              | 27.1%       | 6.5%      | 19.0%                  | 26.5%                  | 36.6%                  |
| cg14099457              | 35.4%       | 7.3%      | 26.8%                  | 34.9%                  | 45.4%                  |
| cg03732535              | 7.0%        | 2.2%      | 4.5%                   | 6.8%                   | 9.8%                   |
| cg02954987              | 42.0%       | 10.1%     | 29.6%                  | 41.5%                  | 56.0%                  |
|                         |             |           |                        |                        |                        |
| <b>Peripheral blood</b> | <b>Mean</b> | <b>SD</b> | <b>10<sup>th</sup></b> | <b>50<sup>th</sup></b> | <b>90<sup>th</sup></b> |
| cg05654765              | 39.4%       | 7.4%      | 30.0%                  | 39.0%                  | 49.8%                  |
| cg14099457              | 51.2%       | 9.3%      | 40.2%                  | 50.8%                  | 64.4%                  |
| cg03732535              | 21.4%       | 5.6%      | 14.1%                  | 21.2%                  | 29.2%                  |
| cg02954987              | 63.3%       | 11.0%     | 49.4%                  | 63.5%                  | 77.8%                  |

**Table S2.** Differential methylation (%) (95% CI) in cord blood DNA associated with a 50% reduction in prenatal residential proximity to major roadways, stratified by sex and race/ethnicity.

| CpG        | All <sup>a</sup> |              | White <sup>b</sup> |              | Non-white <sup>c</sup> |              | <i>p</i> <sub>interaction</sub> |
|------------|------------------|--------------|--------------------|--------------|------------------------|--------------|---------------------------------|
|            | Estimate         | 95% CI       | Estimate           | 95% CI       | Estimate               | 95% CI       |                                 |
| cg05654765 | 0.82%            | 0.54%; 1.10% | 0.77%              | 0.44; 1.12   | 0.97%                  | 0.40%; 1.53% | 0.465                           |
| cg14099457 | 0.88%            | 0.56%; 1.19% | 0.85%              | 0.48; 1.23   | 0.92%                  | 0.32%; 1.55% | 0.589                           |
| cg03732535 | 0.19%            | 0.11%; 0.28% | 0.15%              | 0.05%; 0.26% | 0.31%                  | 0.16%; 0.47% | 0.078                           |
| cg02954987 | 1.08%            | 0.65%; 1.51% | 1.10%              | 0.59; 1.62   | 0.98%                  | 0.13%; 1.84% | 0.955                           |

| CpG        | Male <sup>d</sup> |              | Female <sup>e</sup> |              | <i>p</i> <sub>interaction</sub> |
|------------|-------------------|--------------|---------------------|--------------|---------------------------------|
|            | Estimate          | 95% CI       | Estimate            | 95% CI       |                                 |
| cg05654765 | 0.68%             | 0.29%; 1.07% | 1.00%               | 0.56%; 1.41% | 0.316                           |
| cg14099457 | 0.79%             | 0.36%; 1.22% | 1.01%               | 0.53%; 1.50% | 0.516                           |
| cg03732535 | 0.15%             | 0.03%; 0.27% | 0.28%               | 0.15%; 0.42% | 0.215                           |
| cg02954987 | 1.05%             | 0.46%; 1.65  | 1.22%               | 0.57%; 1.87% | 0.715                           |

Model adjusted for maternal [age at enrollment (continuous), pre-pregnancy BMI (continuous), race (white / black / others), smoking status (smoking during pregnancy / former / never), education level (college or graduate / not college or graduate)], neighborhood [median household income (continuous)], children [child's sex (female / male), gestational age (continuous), season (DOB)], and estimated cell proportions (percentage of monocyte, percentage of CD8T cell, percentage of CD4T cell, percentage of NK cell, percentage of B cell, percentage of nucleated red blood cell).

<sup>a</sup> N=482; <sup>b</sup> N=342; <sup>c</sup> N=140; <sup>d</sup> N=230; <sup>e</sup> N=252.

**Figure S1.** Q-Q plot of the association between residential proximity to roadway at birth and cord blood epigenome-wide DNA methylation (x-axis is the expected  $-\log_{10}(p)$ , y-axis is the observed  $-\log_{10}(p)$ , lambda = 0.97).

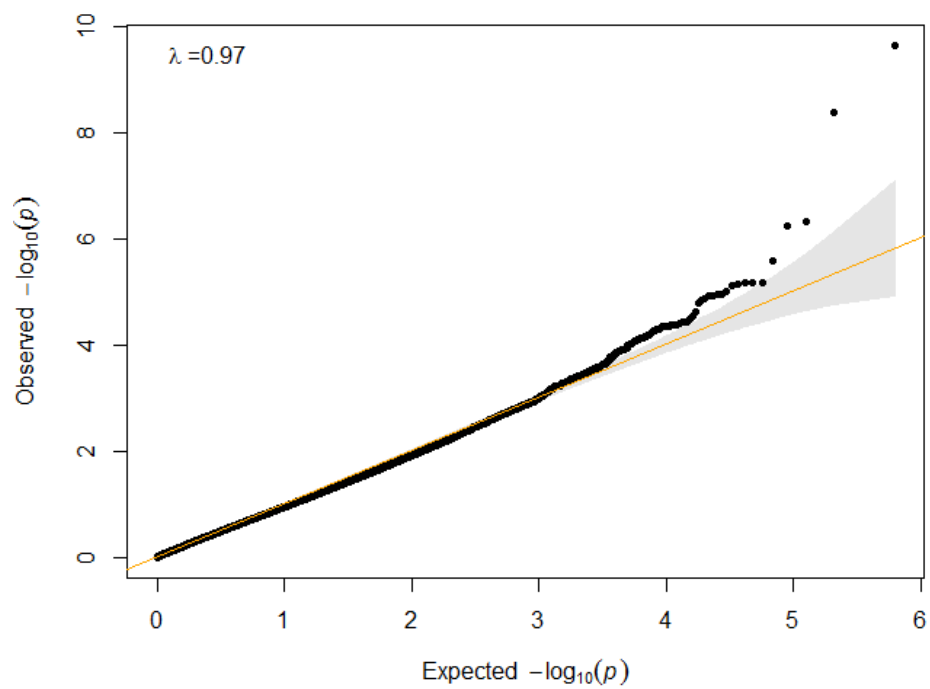

**Figure S2.** Scatter plot of residential proximity to major roadways at birth and DNA methylation in cord blood for the 4 CpG sites that met FDR<0.05 epigenome-wide threshold.

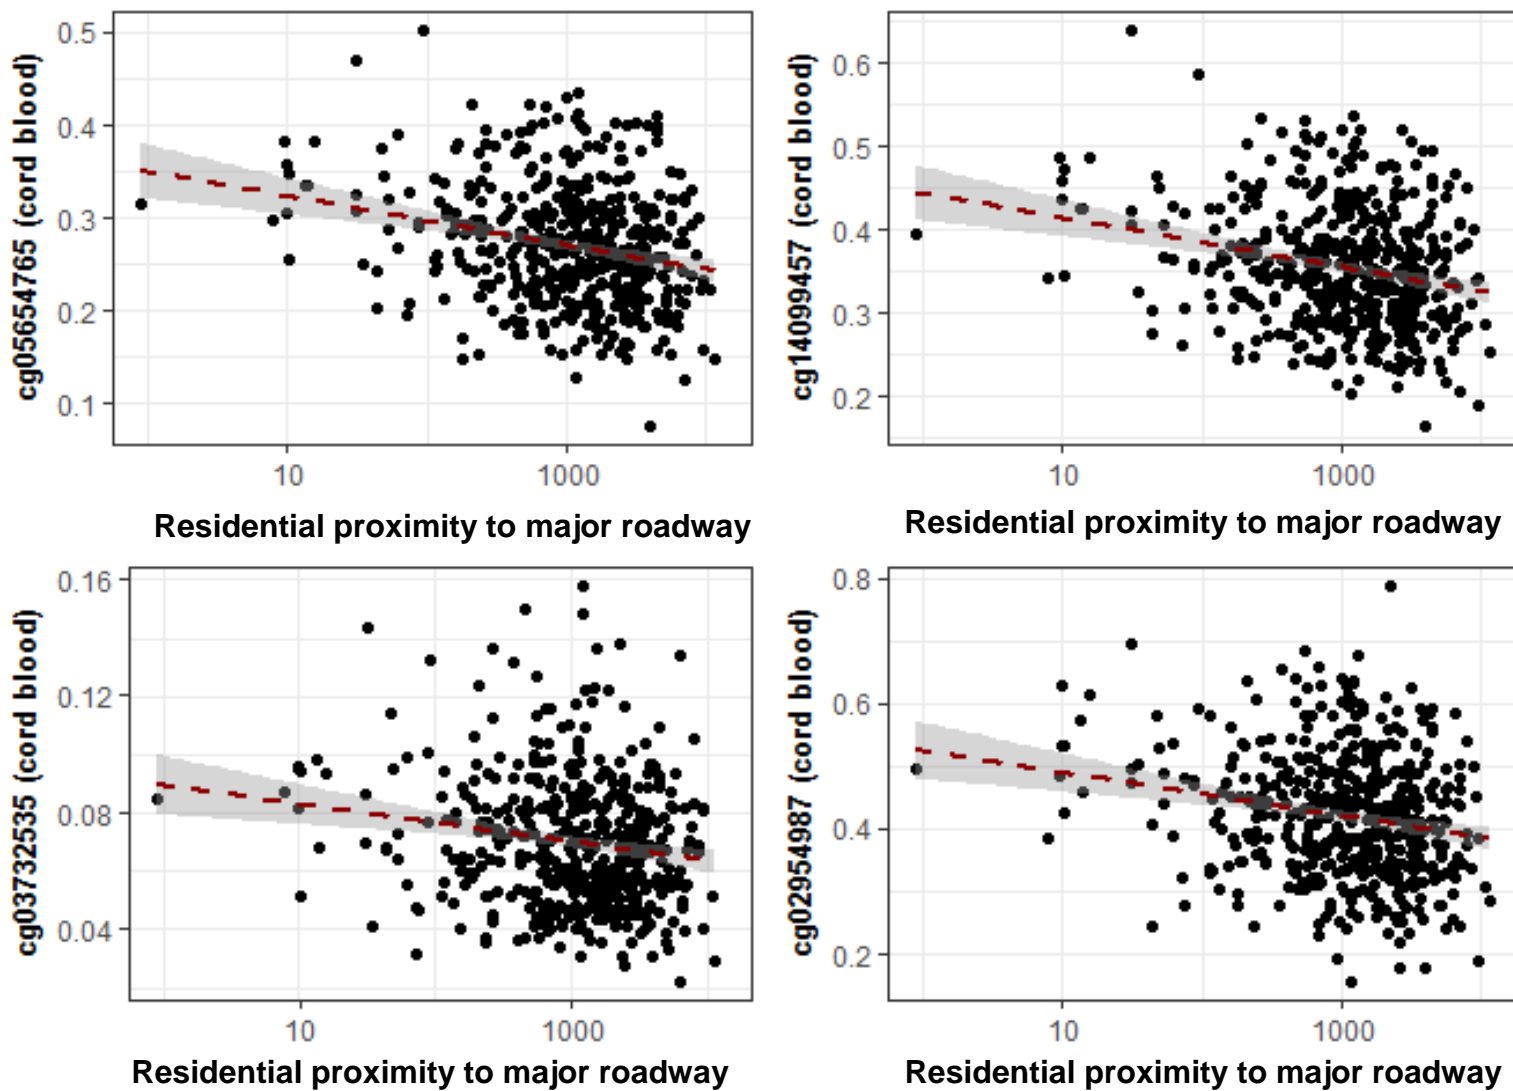

**Figure S3.** Scatter plot of DNA methylation in cord blood of newborns and peripheral blood at mid-childhood for the 4 CpG sites that met FDR<0.05 epigenome-wide threshold.

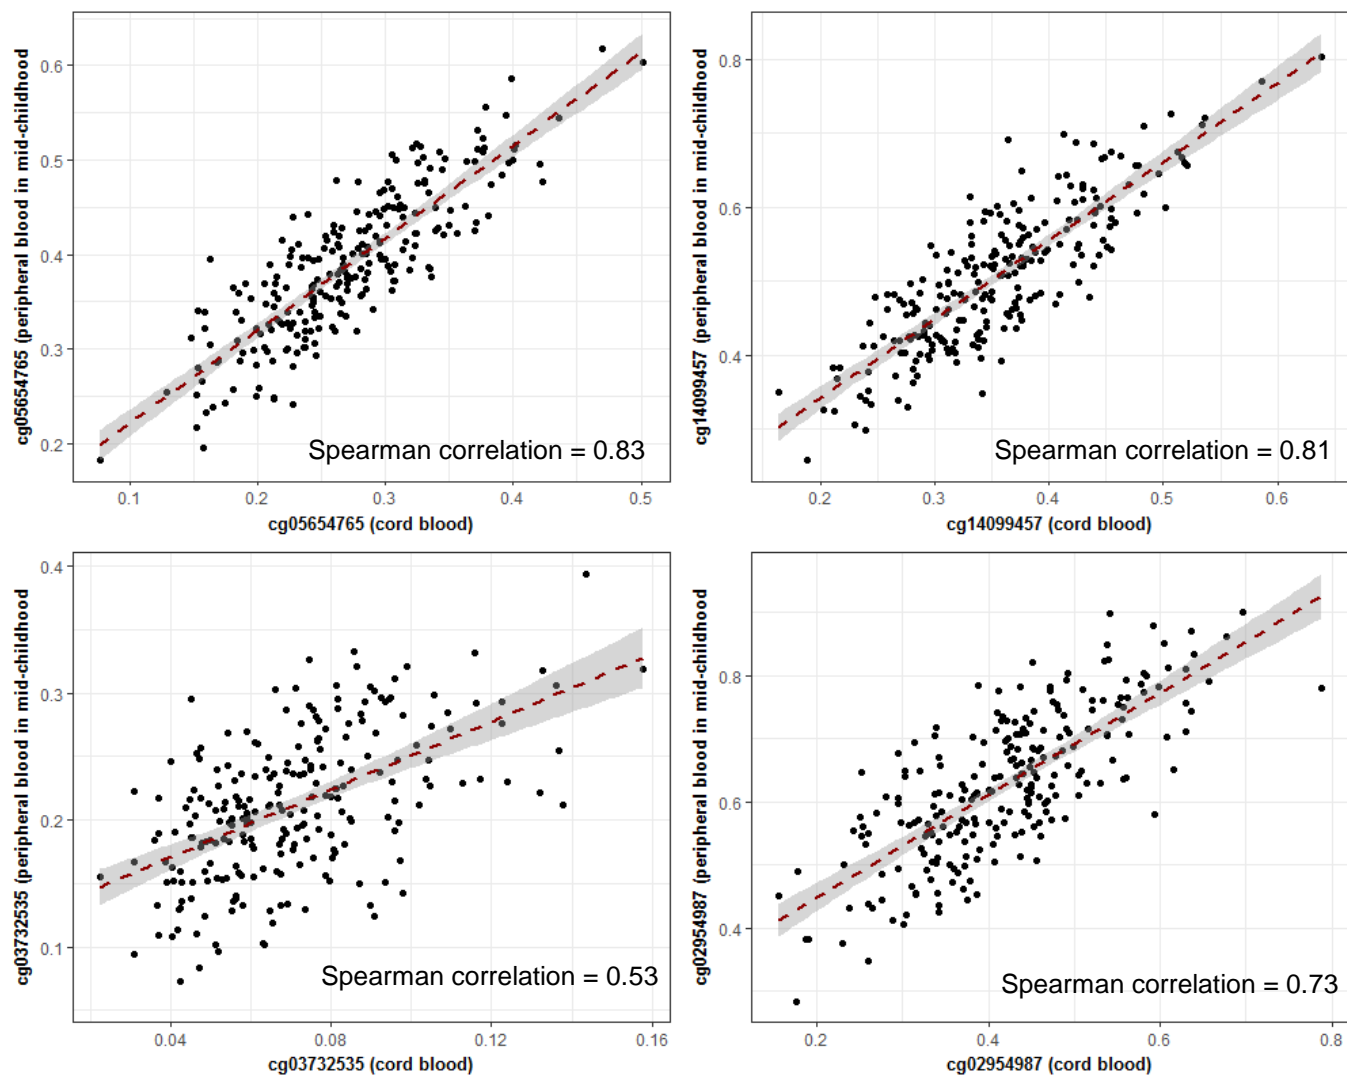

**Figure S4.** Correlation between residential proximity to major roadways at birth and cell proportions (a) in cord blood and (b) in peripheral blood at mid-childhood.

(a)

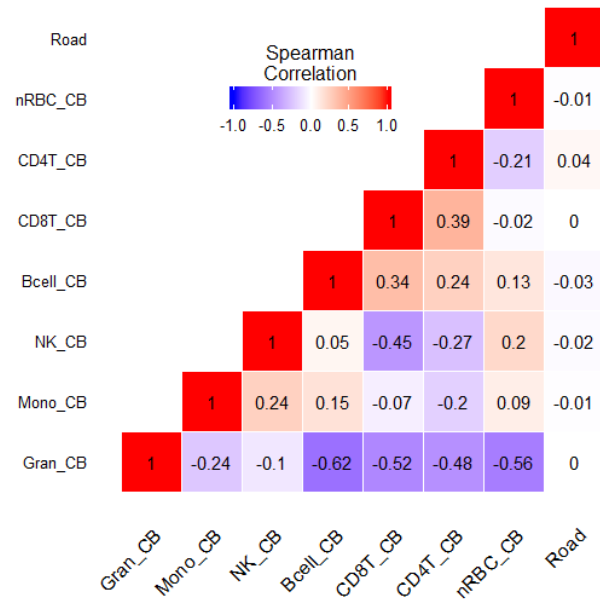

(b)

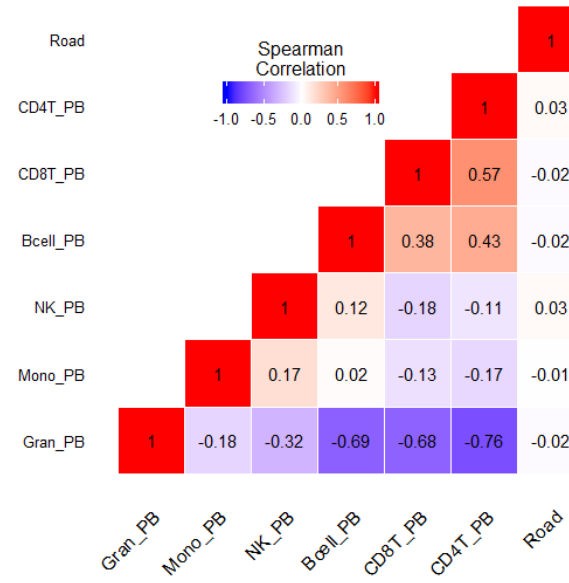

**Figure S5.** A comparison between blood and post-mortal brain tissues (prefrontal cortex, entorhinal cortex, superior temporal gyrus and cerebellum) for the FDR significant CpGs we identified.

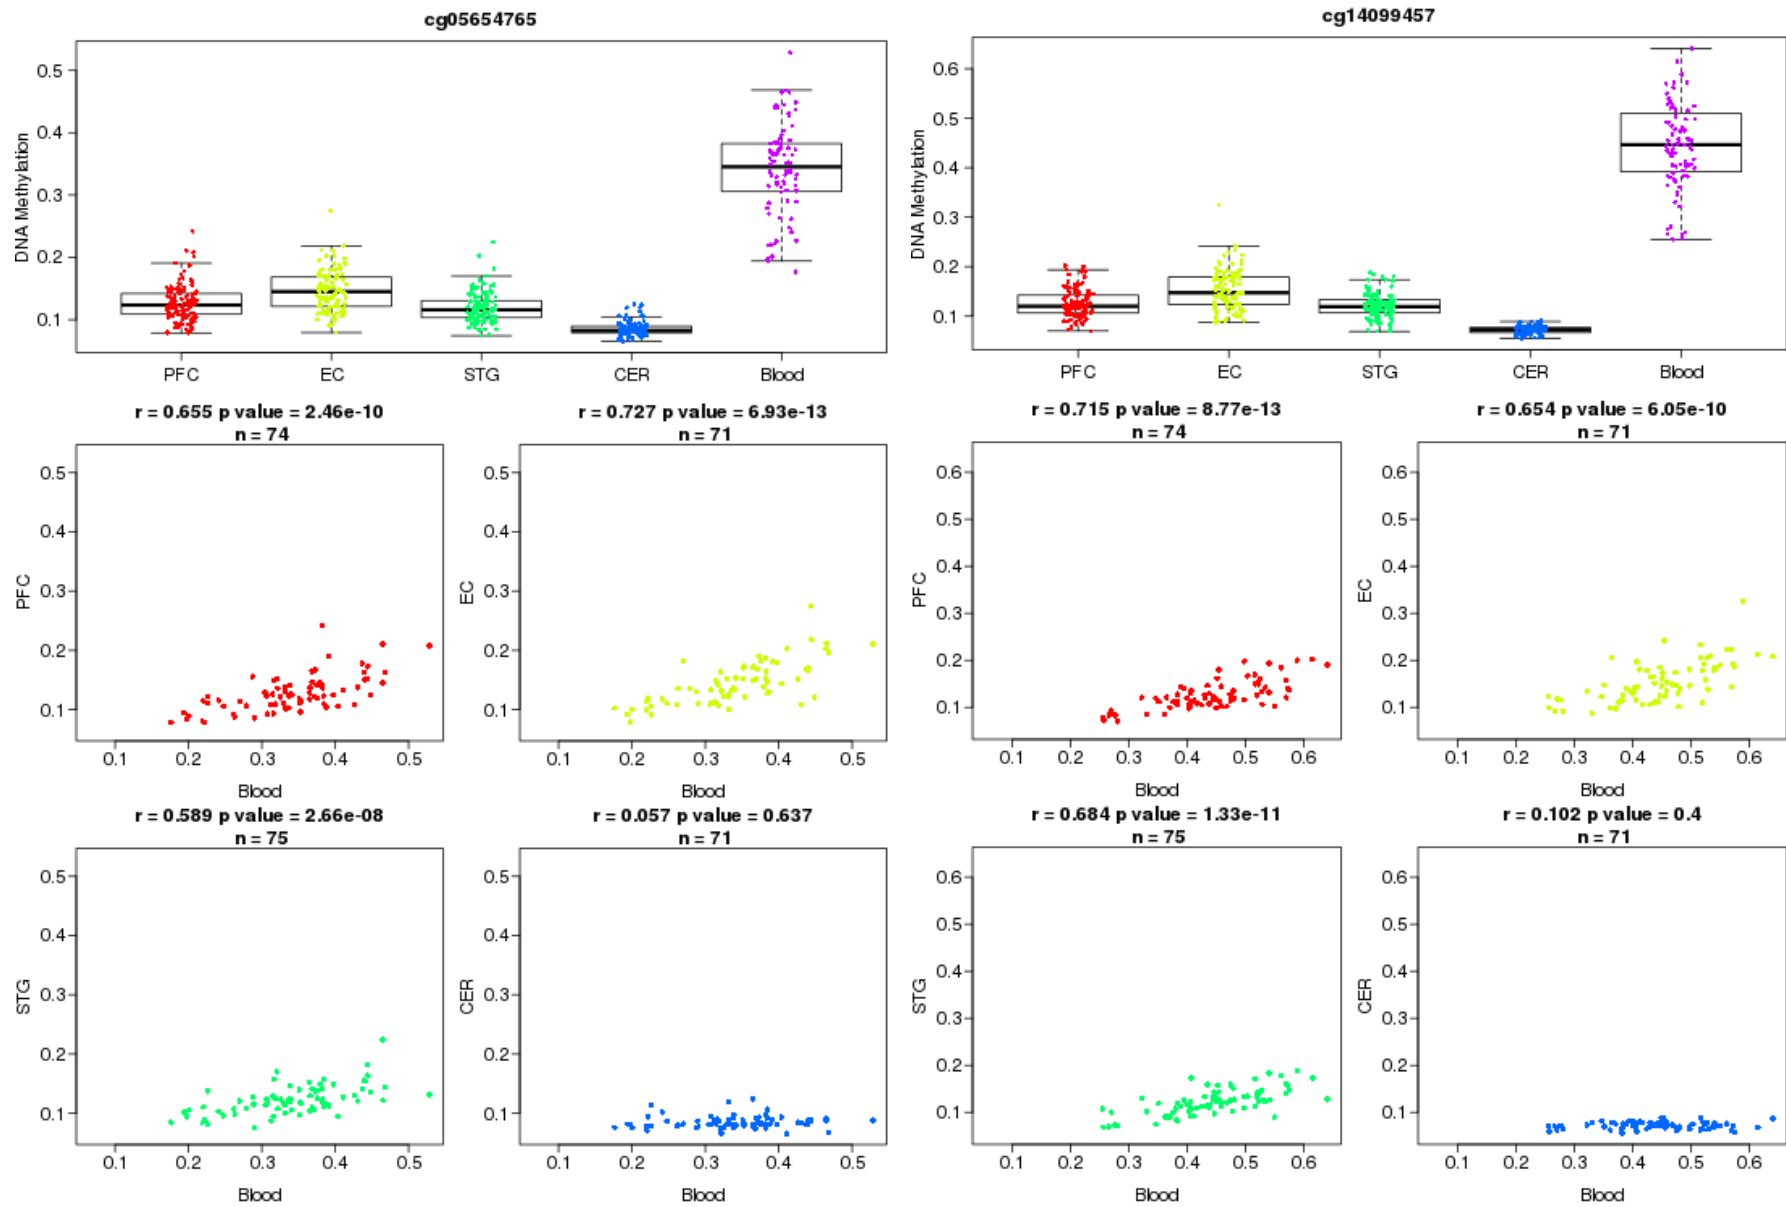

Supplement: ehp2034.s001.acco.pdf [file ehp2034.s001.acco.pdf]
