# Supplementary material
Source: PubMed Central journal article supplement (PMC6375460)
Supplement: ehp2034.smcontents.508.pdf [file ehp2034.smcontents.508.pdf]

**Note to readers with disabilities:** *EHP* strives to ensure that all journal content is accessible to all readers. However, some figures and Supplemental Material published in *EHP* articles may not conform to [508 standards](#) due to the complexity of the information being presented. If you need assistance accessing journal content, please contact [ehp508@niehs.nih.gov](mailto:ehp508@niehs.nih.gov). Our staff will work with you to assess and meet your accessibility needs within 3 working days.

### **Supplemental Material**

#### **Residential Proximity to Major Roadways at Birth, DNA Methylation at Birth and Midchildhood, and Childhood Cognitive Test Scores: Project Viva (Massachusetts, USA)**

Cheng Peng, Martijn den Dekker, Andres Cardenas, Sheryl L. Rifas-Shiman, Heike Gibson, Golareh Agha, Maria H. Harris, Brent A. Coull, Joel Schwartz, Augusto A. Litonjua, Dawn L. DeMeo, Marie-France Hivert, Matthew W. Gilman, Sharon K. Sagiv, Yvonne de Kluizenaar, Janine F. Felix, Vincent W. Jaddoe, Emily Oken, Liesbeth Duijts, Diane R. Gold, and Andrea A. Baccarelli

#### **Table of Contents**

**Table S1.** Summary statistics of FDR-significant CpG sites (for the association between residential proximity to roadways at birth and cord blood DNA methylation) in cord blood (N=482) and in peripheral blood (N=457) in Project Viva. Summary statistics are present on the beta-value scale (0%-100% methylation).

**Table S2.** Differential methylation (%) (95% CI) in cord blood DNA associated with a 50% reduction in prenatal residential proximity to major roadways, stratified by sex and race/ethnicity.

**Figure S1.** Q-Q plot of the association between residential proximity to roadway at birth and cord blood epigenome-wide DNA methylation (x-axis is the expected  $-\log_{10}(\text{p-value})$ , y-axis is the observed  $-\log_{10}(\text{p-value})$ ,  $\lambda = 0.97$ ).

**Figure S2.** Scatter plot of residential proximity to major roadways at birth and DNA methylation in cord blood for the 4 CpG sites that met  $\text{FDR} < 0.05$  epigenome-wide threshold.

**Figure S3.** Scatter plot of DNA methylation in cord blood of newborns and peripheral blood at mid-childhood for the 4 CpG sites that met  $\text{FDR} < 0.05$  epigenome-wide threshold.

**Figure S4.** Correlation between residential proximity to major roadways at birth and cell proportions (a) in cord blood and (b) in peripheral blood at mid-childhood.

**Figure S5.** A comparison between blood and post-mortal brain tissues (prefrontal cortex, entorhinal cortex, superior temporal gyrus and cerebellum) for the FDR significant CpGs we identified.

**Additional File - Excel Document**
